# Supplementary material for: Orally bioavailable CB2 receptor agonists attenuate neuroinflammation and stabilize the blood–brain barrier
Source: Research Square preprint supplement (doi:10.21203/rs.3.rs-9705876/v1), 2026-06-03
Supplement: Supplementary file 1 [file 1f79c43fab6994d1ce3f0b1c.doc]

Supplemental figure for article “**Orally active CB2 receptor agonists attenuate neuroinflammation and stabilize the blood–brain barrier**”

Slava Rom1,2, Viviana Zuluaga-Ramirez1, Sachin Gaghate1, Nancy L. Reichenbach1, Danielle Thor1, Mario Van der Stelt3, Christoph Ullmer4, Pal Pacher5, Yuri Persidsky1,2

*1Department of Pathology and Laboratory Medicine, 2Center for Substance Abuse Research, Temple University School of Medicine, Philadelphia PA 19140, USA, 3Department of Bio-organic Synthesis, Leiden University, Leiden, The Netherlands, 4F. Hoffmann-La Roche AG Pharma Research and Early Development Ophthalmology Discovery, Roche Innovation Center, CH-4070 Basel, Switzerland and the 5Laboratory of Cardiovascular Physiology and Tissue Injury, National Institutes of Health/NIAAA, Bethesda, MD 20852, USA.*

**
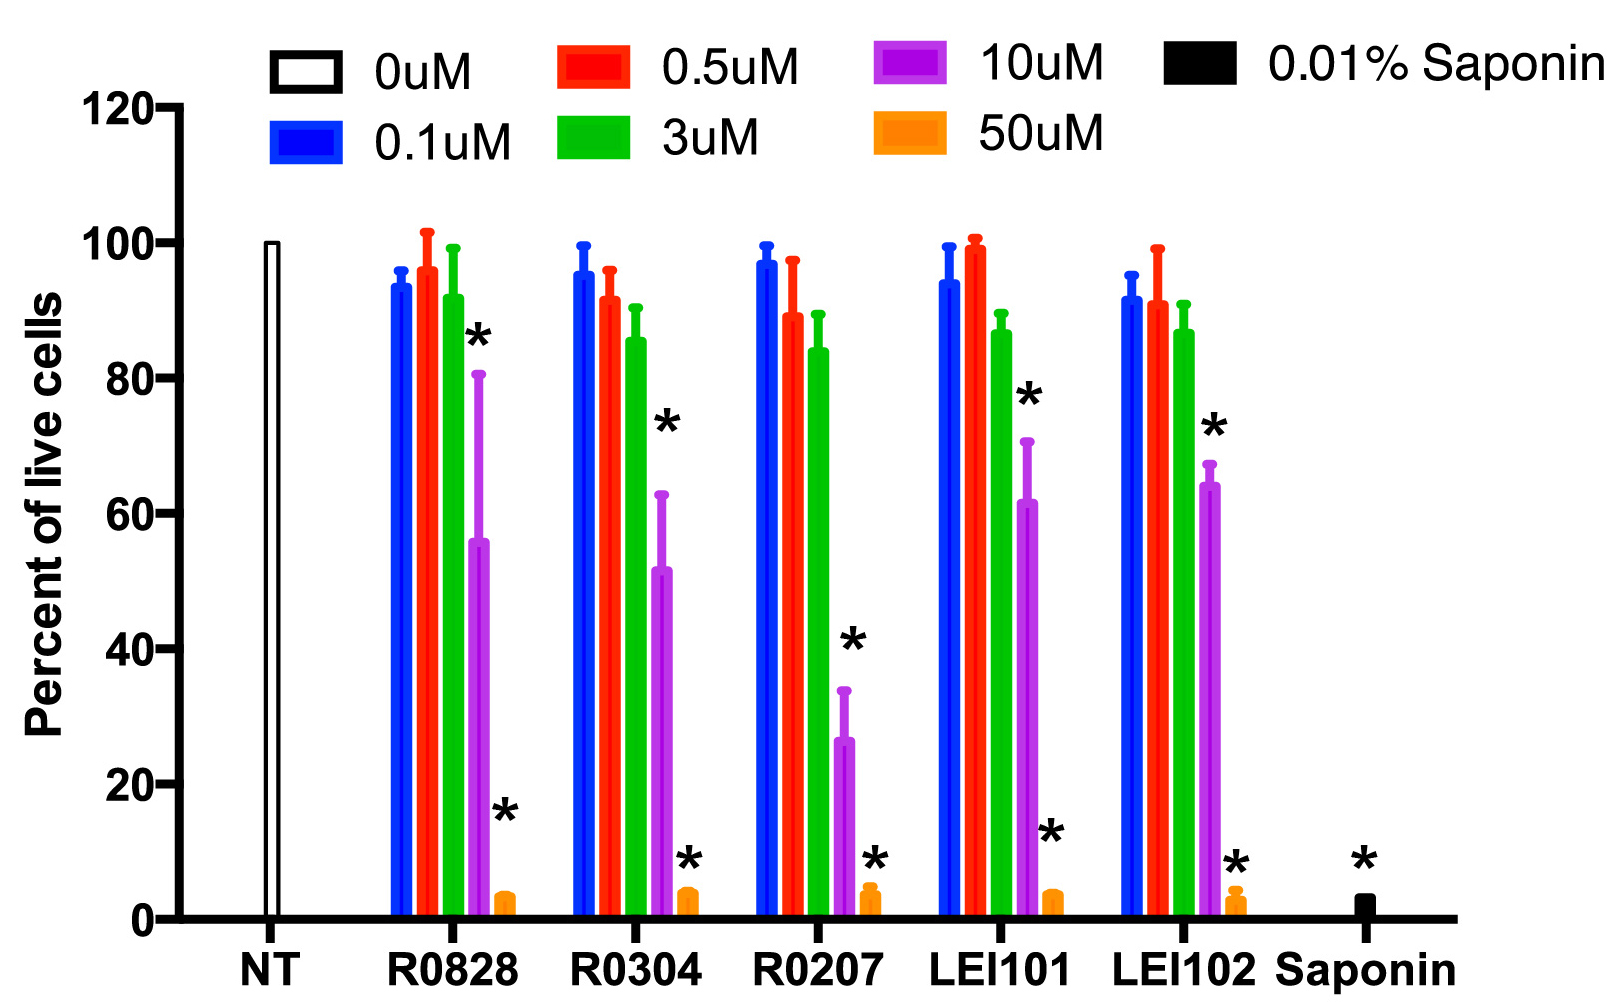
**

**Supplemental Figure 1.** Novel CB2 agonists do not affect BMVEC viability. The Live-Dead assay was performed on CB2-treated BMVEC. The number of non-treated cells was assigned as 100%. Saponin, a cell death initiator, was also included as a control. The results shown are mean values ± SEM for duplicate cultures of BMVEC prepared from different donors (*p<0.05 saponin-treated or CB2-treated cells versus non-treated cells).
